# Supplementary material for: PRC2-Mediated H3K27me3 Contributes to Transcriptional Regulation of FIT-Dependent Iron Deficiency Response
Source: PubMed Central journal article supplement (PMC6532572; doi:10.3389/fpls.2019.00627), 2019-05-16
Supplement: Image_1.pdf [file Image_1.pdf]

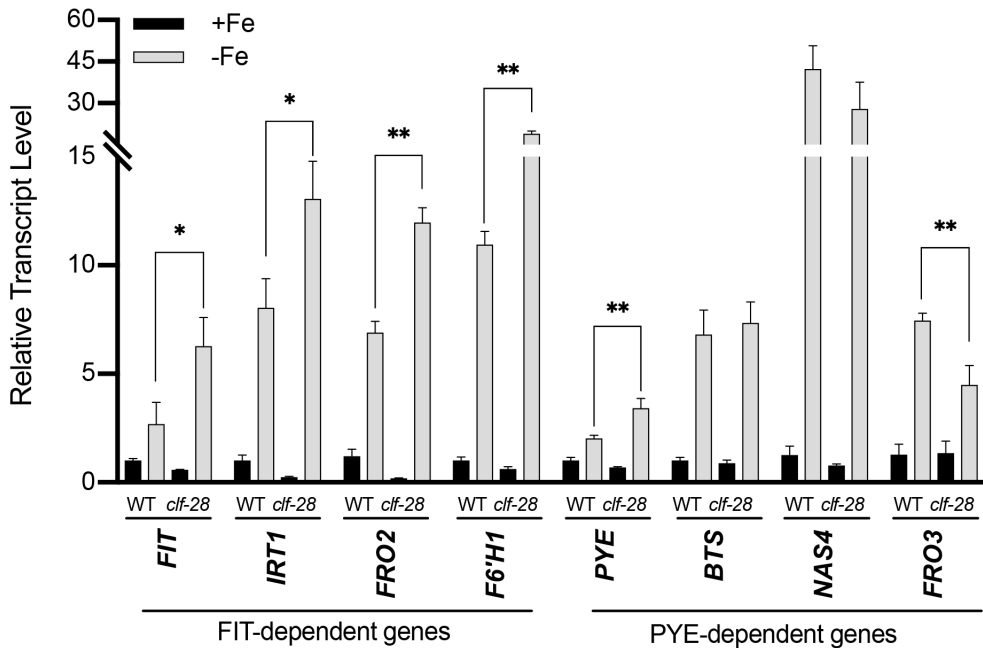

**Figure S1. Transcript levels of iron deficiency inducible genes in wild type and *clf-28* (SALK\_139371) roots.** Quantitative RT-PCR was conducted with total RNA extracted from roots of 12-day-old plants grown on B5 without sucrose and then transferred to iron sufficient (+Fe; 100  $\mu$ M Fe) or iron deficient (-Fe; 300 $\mu$ M ferrozine) media for 3 days. Transcript levels of FIT-dependent genes and PYE-dependent genes were normalized to an internal control, *ACT2*, and reported as the expression ratio relative to wild type under iron-sufficient conditions. Mean values of three biological replicates are shown. Error bars represent standard error. (\*  $p < 0.05$ ; \*\*  $p < 0.01$ ).
