# Supplementary material for: PRC2-Mediated H3K27me3 Contributes to Transcriptional Regulation of FIT-Dependent Iron Deficiency Response
Source: PubMed Central journal article supplement (PMC6532572; doi:10.3389/fpls.2019.00627), 2019-05-16
Supplement: Image_3.pdf [file Image_3.pdf]

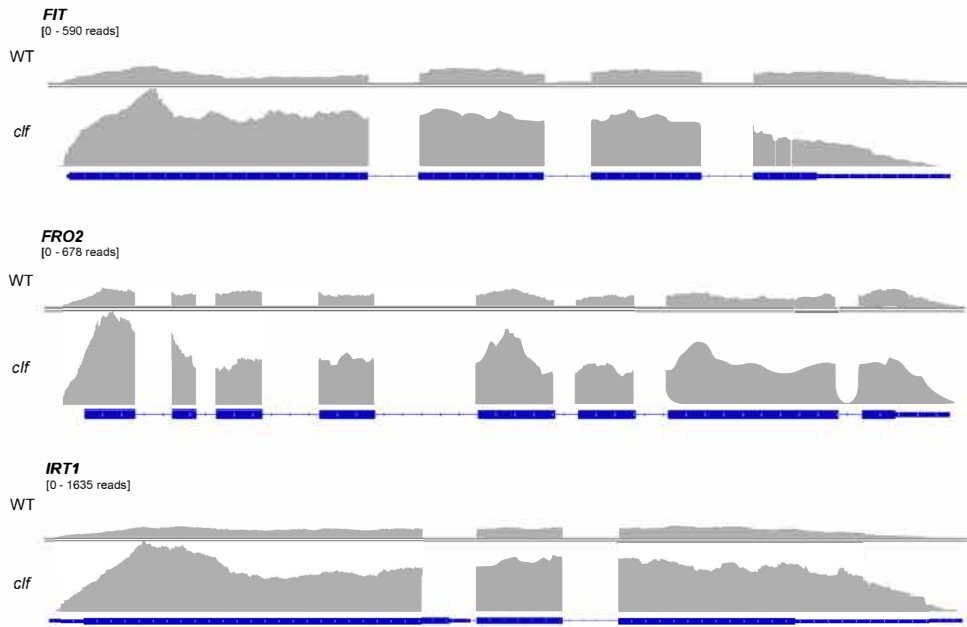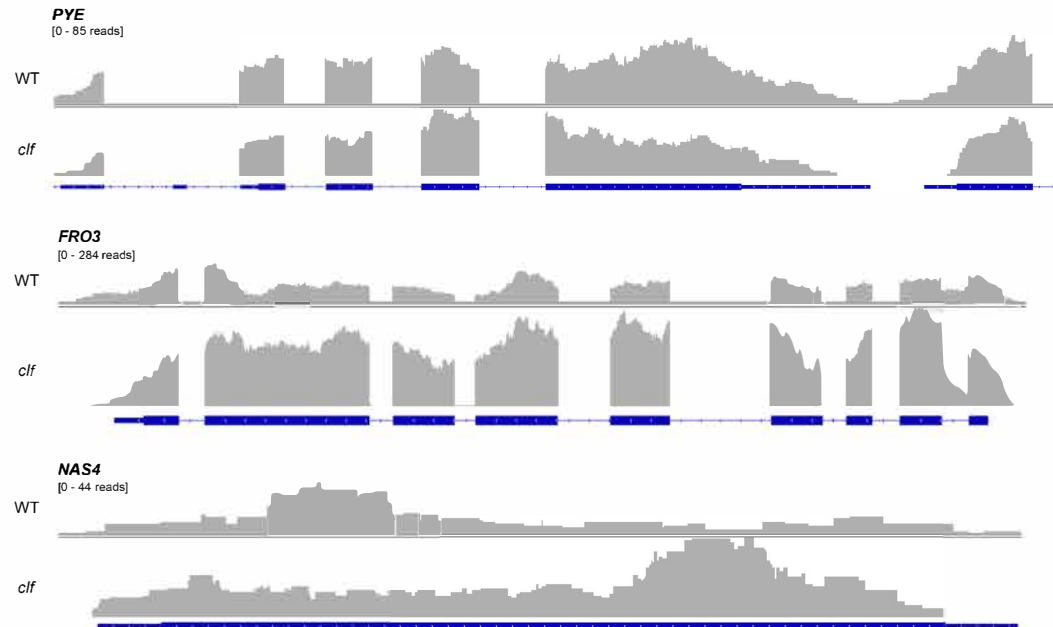

**Figure S3. RNA-seq read count histograms for FIT- and PYE-dependent genes under iron sufficiency.** Gene diagrams depict introns (line) and exons (boxes) and are aligned with read counts. The read count range, denoted below the gene name, were scaled to the maximum number of reads obtained in *clf*. Read count scale is equivalent for wild type and *clf* within each gene.
