# Supplementary material for: PRC2-Mediated H3K27me3 Contributes to Transcriptional Regulation of FIT-Dependent Iron Deficiency Response
Source: PubMed Central journal article supplement (PMC6532572; doi:10.3389/fpls.2019.00627), 2019-05-16
Supplement: Image_4.pdf [file Image_4.pdf]

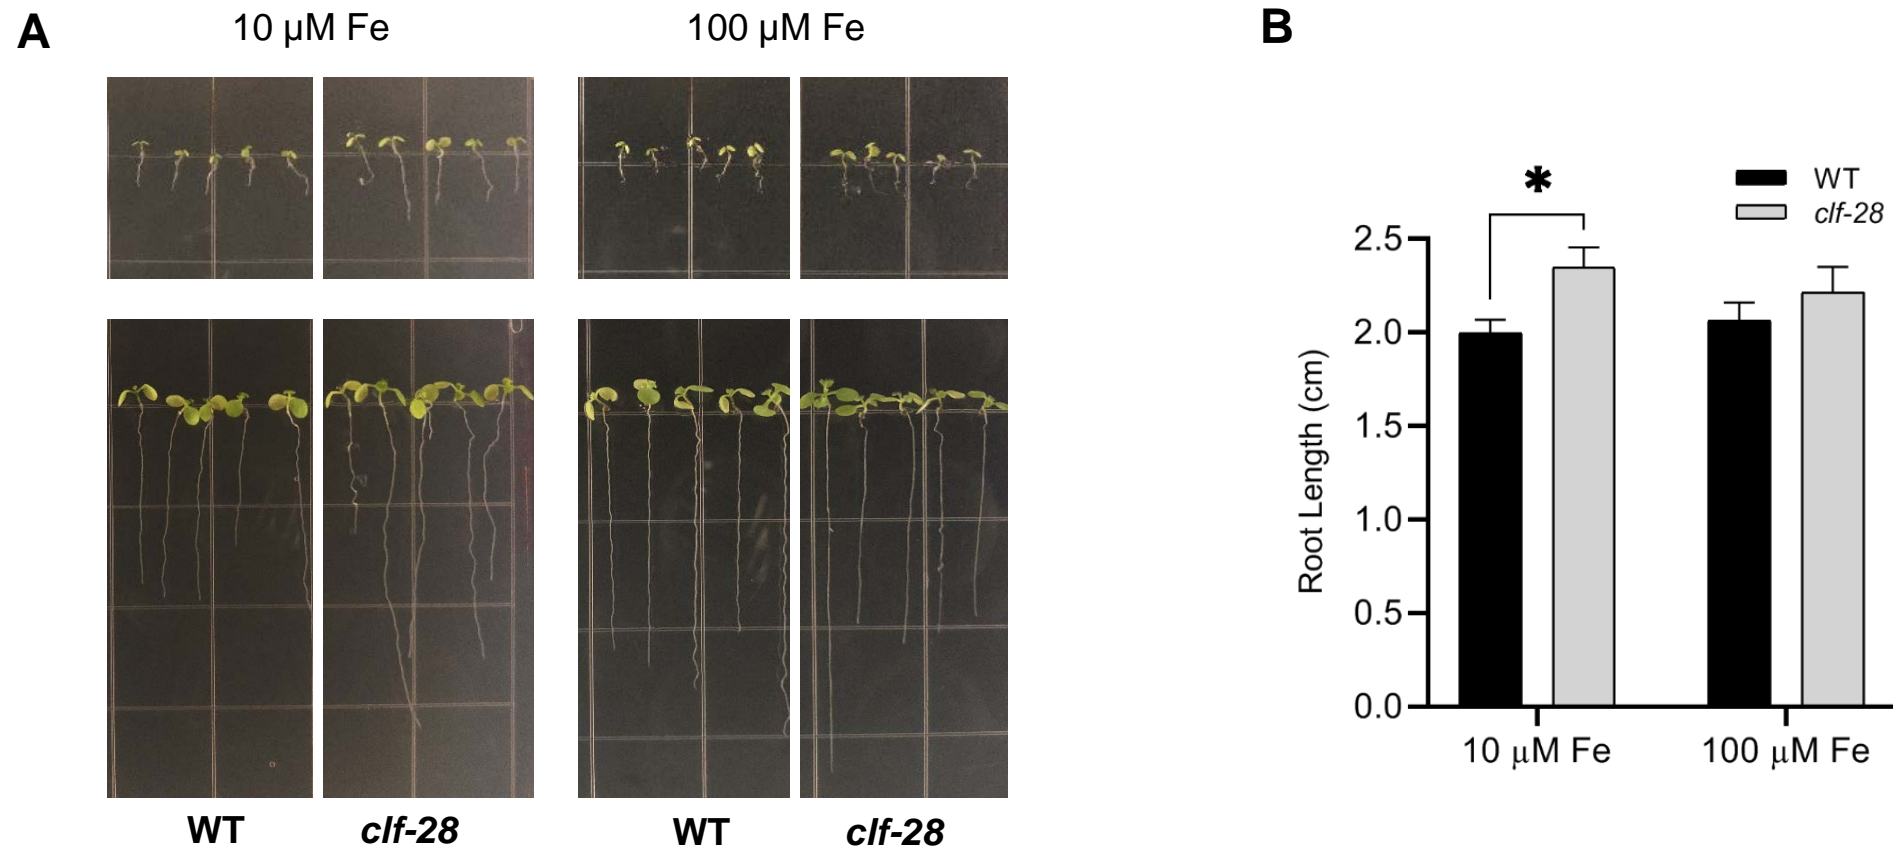

**Figure S4.** Growth phenotypes of a second *clf* allele, *clf-28*, and wild type under low iron conditions. **(A)** Wild type and *clf* plants were germinated and grown on iron-limiting (10  $\mu\text{M}$  Fe) and iron-sufficient (100  $\mu\text{M}$  Fe) media. Photos in upper panel were taken 4 days after germination, and photos in lower panel were taken 10 days after germination. **(B)** Quantified root length. Mean values of at least 29 seedlings are shown with standard error (\*  $p < 0.05$ ).
