# Supplementary material for: PRC2-Mediated H3K27me3 Contributes to Transcriptional Regulation of FIT-Dependent Iron Deficiency Response
Source: PubMed Central journal article supplement (PMC6532572; doi:10.3389/fpls.2019.00627), 2019-05-16
Supplement: Image_5.pdf [file Image_5.pdf]

Day 4

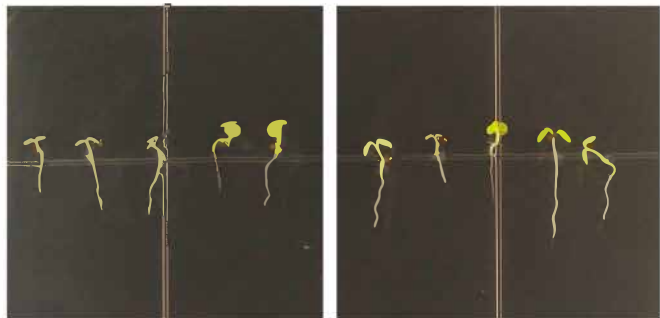

**WT**

***clf-29***

Day 9

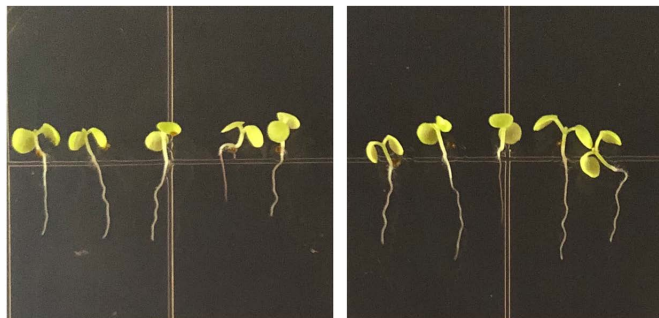

**WT**

***clf-29***

**Figure S5. Wild type and *clf-29* growth in iron deficient conditions.** Wild type and *clf-29* plants were germinated and grown on media with no iron (0  $\mu$ M) supplemented with 300  $\mu$ M ferrozine. Photos were taken 4 and 9 days after germination.
