# Supplementary material for: PRC2-Mediated H3K27me3 Contributes to Transcriptional Regulation of FIT-Dependent Iron Deficiency Response
Source: PubMed Central journal article supplement (PMC6532572; doi:10.3389/fpls.2019.00627), 2019-05-16
Supplement: Table_1.pdf [file Table_1.pdf]

**Supplementary Table S1: Sequences of qRT-PCR primers.**

| <b>Gene</b>  | <b>Forward Primer</b>          | <b>Reverse Primer</b>           |
|--------------|--------------------------------|---------------------------------|
| <i>ACT2</i>  | 5'-CCAAGCTGTTCTCTCCTTGTACGC-3' | 5'-TCACCAGAATCCAGCACAATACC-3'   |
| <i>BTS</i>   | 5'-GAAGAATTGCAAGCTGGAGCAC-3'   | 5'-TCCTTTGCAAGCCCAACCAGAG-3'    |
| <i>IRT1</i>  | 5'-ACTTCAACTGCGCCGGAAGAATG-3'  | 5'-AGCTTTGTTGACGCACGGGTTC-3'    |
| <i>FIT</i>   | 5'-AGCTCTCCTTCTCCGGACACATAC-3' | 5'-GCTCTGTTCTGAAGCATGTCCCATC-3' |
| <i>FRO2</i>  | 5'-GCTTCCGCCGATTTCTTAAGGC-3'   | 5'-AACGGAGTTATCCCGCTTCCT-3'     |
| <i>FRO3</i>  | 5'-CCATACCTTTGTCACCATCACTCC-3' | 5'-ATCCAGCCTTGCTTGCCATAAG-3'    |
| <i>F6'H1</i> | 5'-ACGACTGTTAGGTTTGGGACGAG-3'  | 5'-TCCTGCAGATATCAGGCCAGAAC-3'   |
| <i>NAS4</i>  | 5'-ATGCTGAGAAGCGCTCATGGAC-3'   | 5'-CGTTCGAGAGTCACAAGGCTCAACG-3' |
| <i>PYE</i>   | 5'-TCTCACCGGAGAAAGAAAGGTGAC-3' | 5'-GCAGTAGCATTTGCTTCATCAGAC-3'  |
