# Supplementary material for: PRC2-Mediated H3K27me3 Contributes to Transcriptional Regulation of FIT-Dependent Iron Deficiency Response
Source: PubMed Central journal article supplement (PMC6532572; doi:10.3389/fpls.2019.00627), 2019-05-16
Supplement: Table_3.pdf [file Table_3.pdf]

**Supplementary Table 3: Sequences of ChIP-qPCR primers**

| <b>Gene</b>            | <b>Forward Primer</b>           | <b>Reverse Primer</b>            |
|------------------------|---------------------------------|----------------------------------|
| <i>IRT1</i> Exon 1 (a) | 5'- ACTTCAACTGCGCCGGAAGAATG -3' | 5'- AGCTTTGTTGACGCACGGGTTC -3'   |
| <i>IRT1</i> Exon 1 (b) | 5'- TCTTGAAGAGAACCCGTGGCA -3'   | 5'- CCAACTGCGTTCTTGCTGGT -3'     |
| <i>FRO2</i> 5' UTR (a) | 5'- TTCTCACTAAAGCGATCGTACCG -3' | 5'- TCTTCTCCTGCAGATGGGTTC -3'    |
| <i>FRO2</i> Exon 1 (b) | 5'- TCGAACCCATCTGCAGGAGAA -3'   | 5'- CGCAGATGTGGCAACCACTTG -3'    |
| <i>FIT</i> Exon 1 (a)  | 5'- GGAAGAGTCAACGCTCTGTCA -3'   | 5'- AGAACTGGGTTTTTCGTCAATGGT -3' |
| <i>FIT</i> Exon 1 (b)  | 5'- CATCCCAACACCTGTGATGA -3'    | 5'- ACCGTCTGAAGCTACGGAATG -3'    |
